# Supplementary material for: Predicting aquatic development and mortality rates of Aedes aegypti
Source: PLoS One. 2019 May 21;14(5):e0217199. doi: 10.1371/journal.pone.0217199 (PMC6528993; doi:10.1371/journal.pone.0217199)
Supplement: S1 Table — (DOCX) [file pone.0217199.s001.docx]

*Table S1. Analysis of predictor estimates for average pupation rate*

| **Coefficient** | **Estimate** | **Standard Error** | **t value** | **p value** |
| --- | --- | --- | --- | --- |
|  | 1.203x10-3 | 2.599x10-4 | 4.629 | 4.43x10-6 |
|  | 4.567x10-4 | 1.693x10-5 | 26.977 | < 2x10-16 |
|  | 5.485x10-4 | 5.530x10-5 | 9.918 | < 2x10-16 |
|  | 1.259x10-1 | 6.796x10-3 | 18.522 | < 2x10-16 |
|  | 8.573x10-3 | 4.596x10-4 | 18.653 | < 2x10-16 |
|  | -5.028x10-3 | 4.445x10-4 | -11.313 | < 2x10-16 |
|  | -3.411x10-3 | 4.238x10-4 | -8.050 | 3.83x10-15 |
|  | -2.133x10-5 | 1.909x10-6 | -11.176 | < 2x10-16 |
|  | -1.027x10-4 | 5.064x10-6 | -20.271 | < 2x10-16 |
|  | 1.035x10-5 | 1.889x10-5 | 0.548 | 0.584 |
|  | -5.453x10-7 | 6.691x10-7 | -0.815 | 0.415 |
