# Supplementary material for: Predicting aquatic development and mortality rates of Aedes aegypti
Source: PLoS One. 2019 May 21;14(5):e0217199. doi: 10.1371/journal.pone.0217199 (PMC6528993; doi:10.1371/journal.pone.0217199)
Supplement: S2 Table — (DOCX) [file pone.0217199.s002.docx]

*Table S2. Analysis of predictor estimates for average adult emergence rate*

| **Coefficient** | **Estimate** | **Standard Error** | **t value** | **p value** |
| --- | --- | --- | --- | --- |
|  | -1.961x10-4 | 1.604x10-4 | -1.223 | 0.222 |
|  | 3.634x10-4 | 1.045x10-5 | 34.789 | < 2x10-16 |
|  | 3.575x10-4 | 3.412x10-5 | 10.475 | < 2x10-16 |
|  | 8.520x10-2 | 4.194x10-3 | 20.316 | < 2x10-16 |
|  | 5.101x10-3 | 2.836x10-4 | 17.990 | < 2x10-16 |
|  | -3.218x10-3 | 2.743x10-4 | -11.732 | < 2x10-16 |
|  | -1.832x10-3 | 2.615x10-4 | -7.008 | 5.94x10-12 |
|  | -1.420x10-5 | 1.178x10-6 | -12.058 | < 2x10-16 |
|  | -6.841x10-5 | 3.125x10-6 | -21.894 | < 2x10-16 |
|  | 8.593x10-7 | 1.166x10-5 | 0.074 | 0.941 |
|  | -1.423x10-7 | 4.128x10-7 | -0.345 | 0.730 |
